# Supplementary material for: 2-hydroxy-3-(1-(4-vinylbenzyl)imidazol-3-ium-3-yl)propane-1-sulfonate and 3-(4-vinylbenzyl)dimethylammonio)-2-hydroxypropane-1-sulfonate as New Zwitterionic Monomers
Source: Preprints.org preprint supplement (doi:10.20944/preprints202206.0366.v1), 2022-06-27
Supplement: Supplementary file 3 [file supplementary]

Electronic Supplementary Materials

**2-hydroxy-3-(1-(4-vinylbenzyl)imidazol-3-ium-3-yl)propane-1-sulfonate and 3-(4-vinylbenzyl)dimethylammonio)-2-hydroxypropane-1-sulfonate as new zwitterionic monomers**

**Jihen Ben-Hadj-Salem1,2, Soufiane Touil2, Jacques Rouden1, Jérôme Baudoux1*, and Bénédicte Lepoittevin1***

1Normandie Univ, ENSICAEN, UNICAEN, CNRS, Laboratoire de Chimie Moléculaire et Thio-organique (LCMT), 6 Bd du Maréchal Juin, 14000 CAEN, France; [jihen.ben-hadj-salem@ensicaen.fr](mailto:jihen.ben-hadj-salem@ensicaen.fr) (J. BHS.); [jacques.rouden@ensicaen.fr](mailto:jacques.rouden@ensicaen.fr) (J. R.)

2University of Carthage, Faculty of Sciences of Bizerte, Lab of Hetero-Organic Compounds and Nanostructured Materials (LR18ES11), Jarzouna, 7021, Tunisia; soufiane.touil@fsb.rnu.tn (S. T.)

*****Correspondence: [jerome.baudoux@ensicaen.fr](mailto:jerome.baudoux@ensicaen.fr) (J. B.); [benedicte.lepoittevin@ensicaen.fr](mailto:benedicte.lepoittevin@ensicaen.fr) (B. L.)

NMR spectra of compounds 2 and 4 (S1-S4) 2

IR spectrum of compound 2 and 4 (S5, S6) 4

TGA curve of compound 2 5


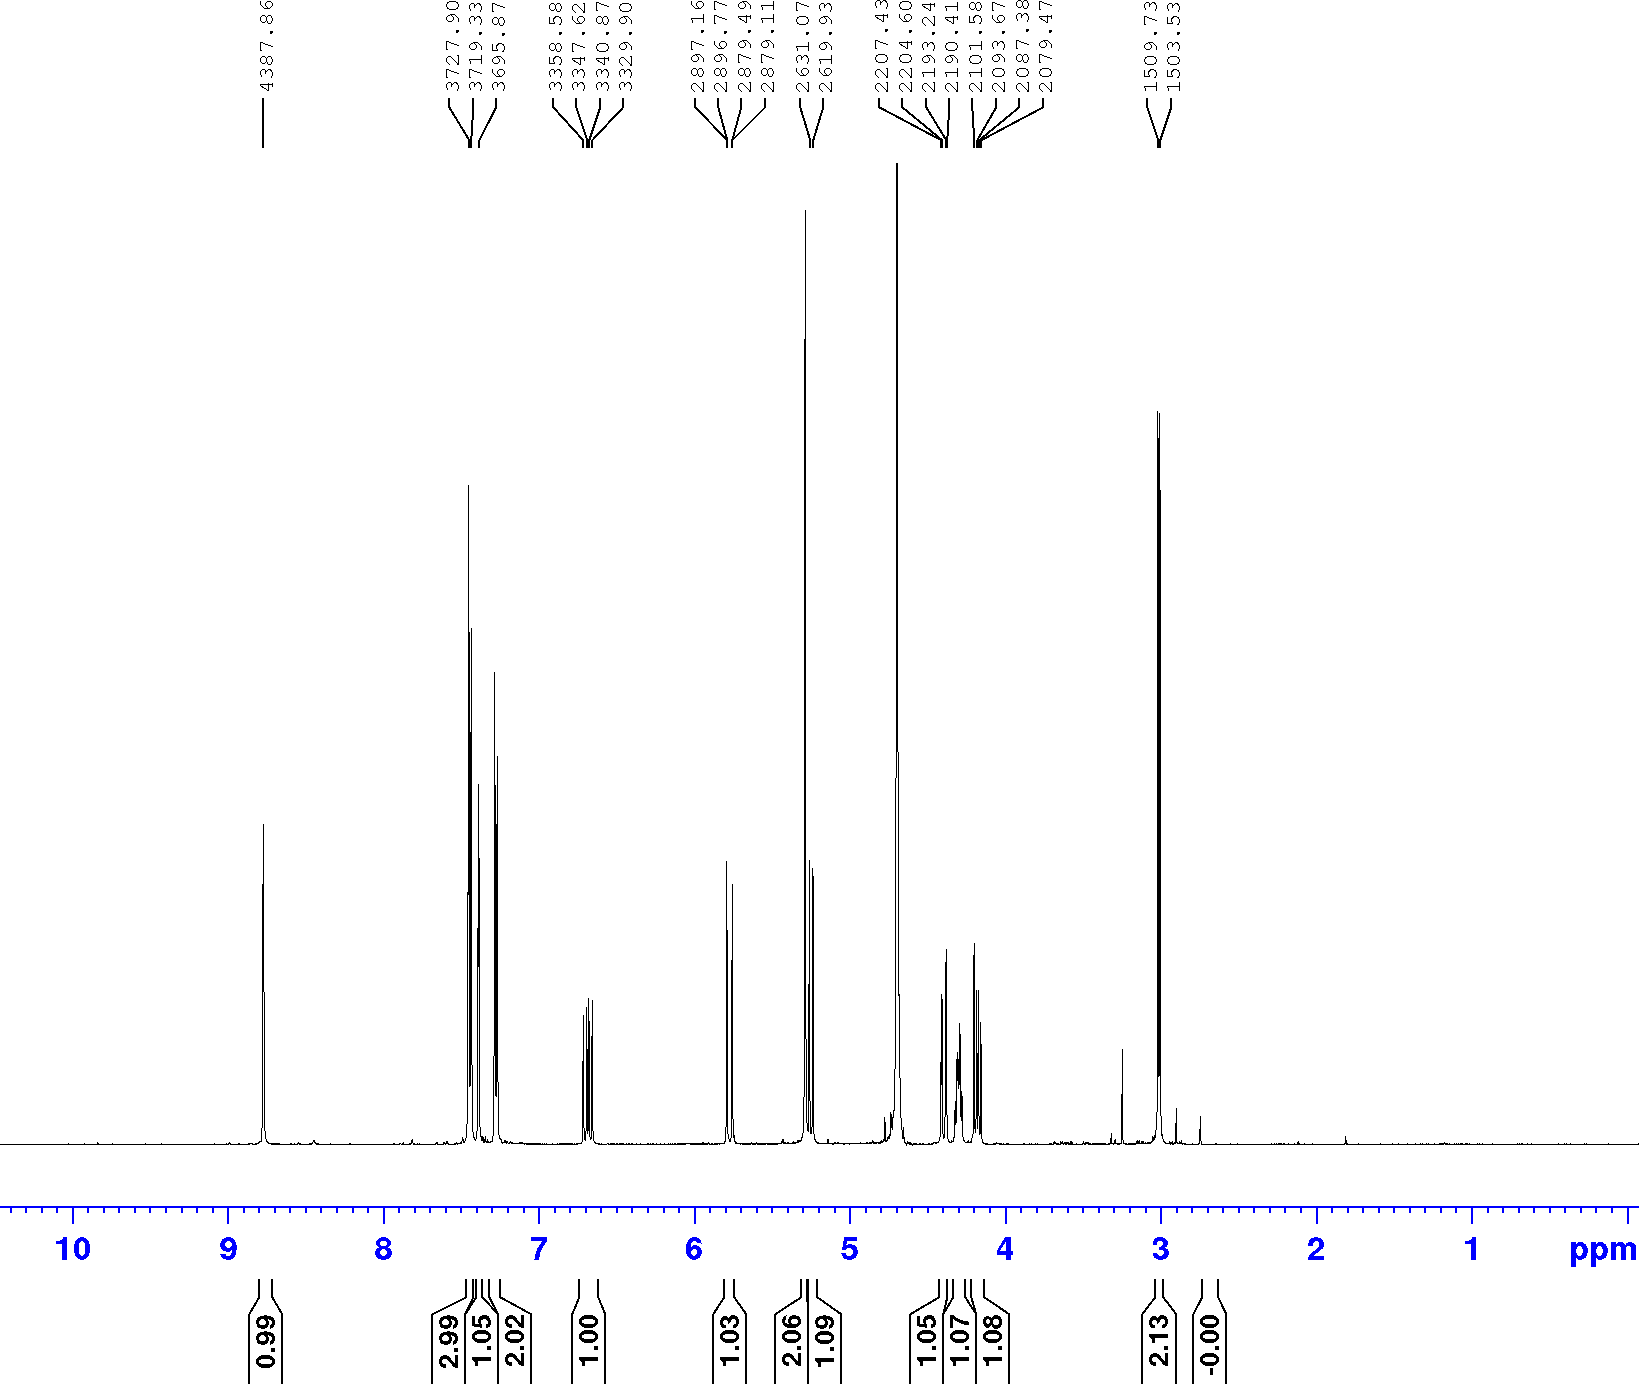


S1: 1H NMR spectrum of monomer **2** recorded in D2O.


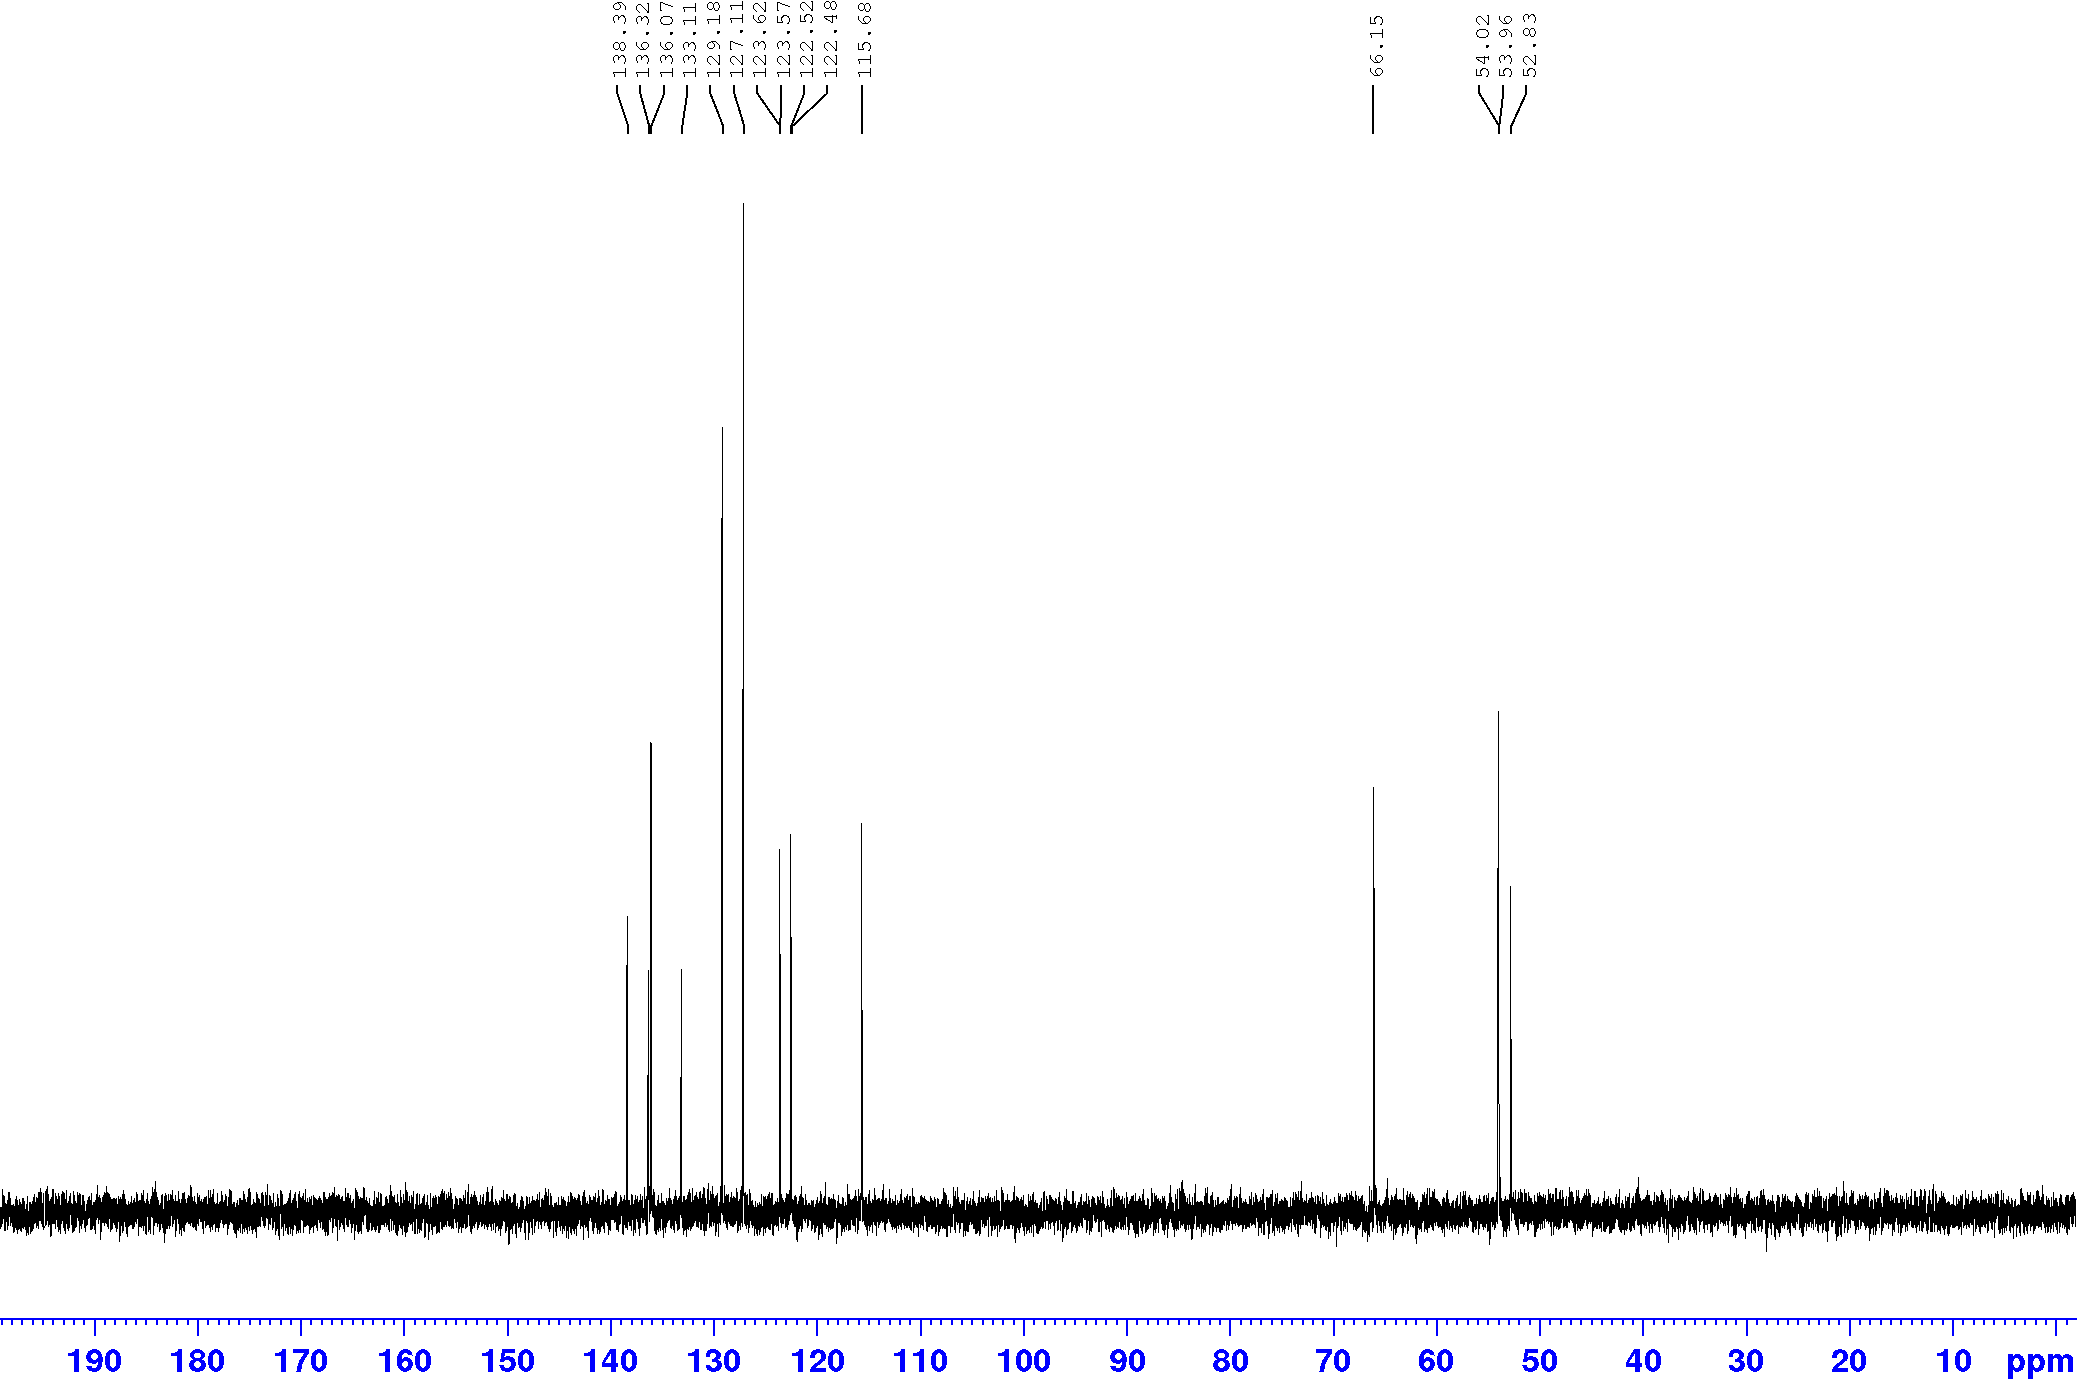


S2: 13C NMR spectrum of monomer **2** recorded in D2O.


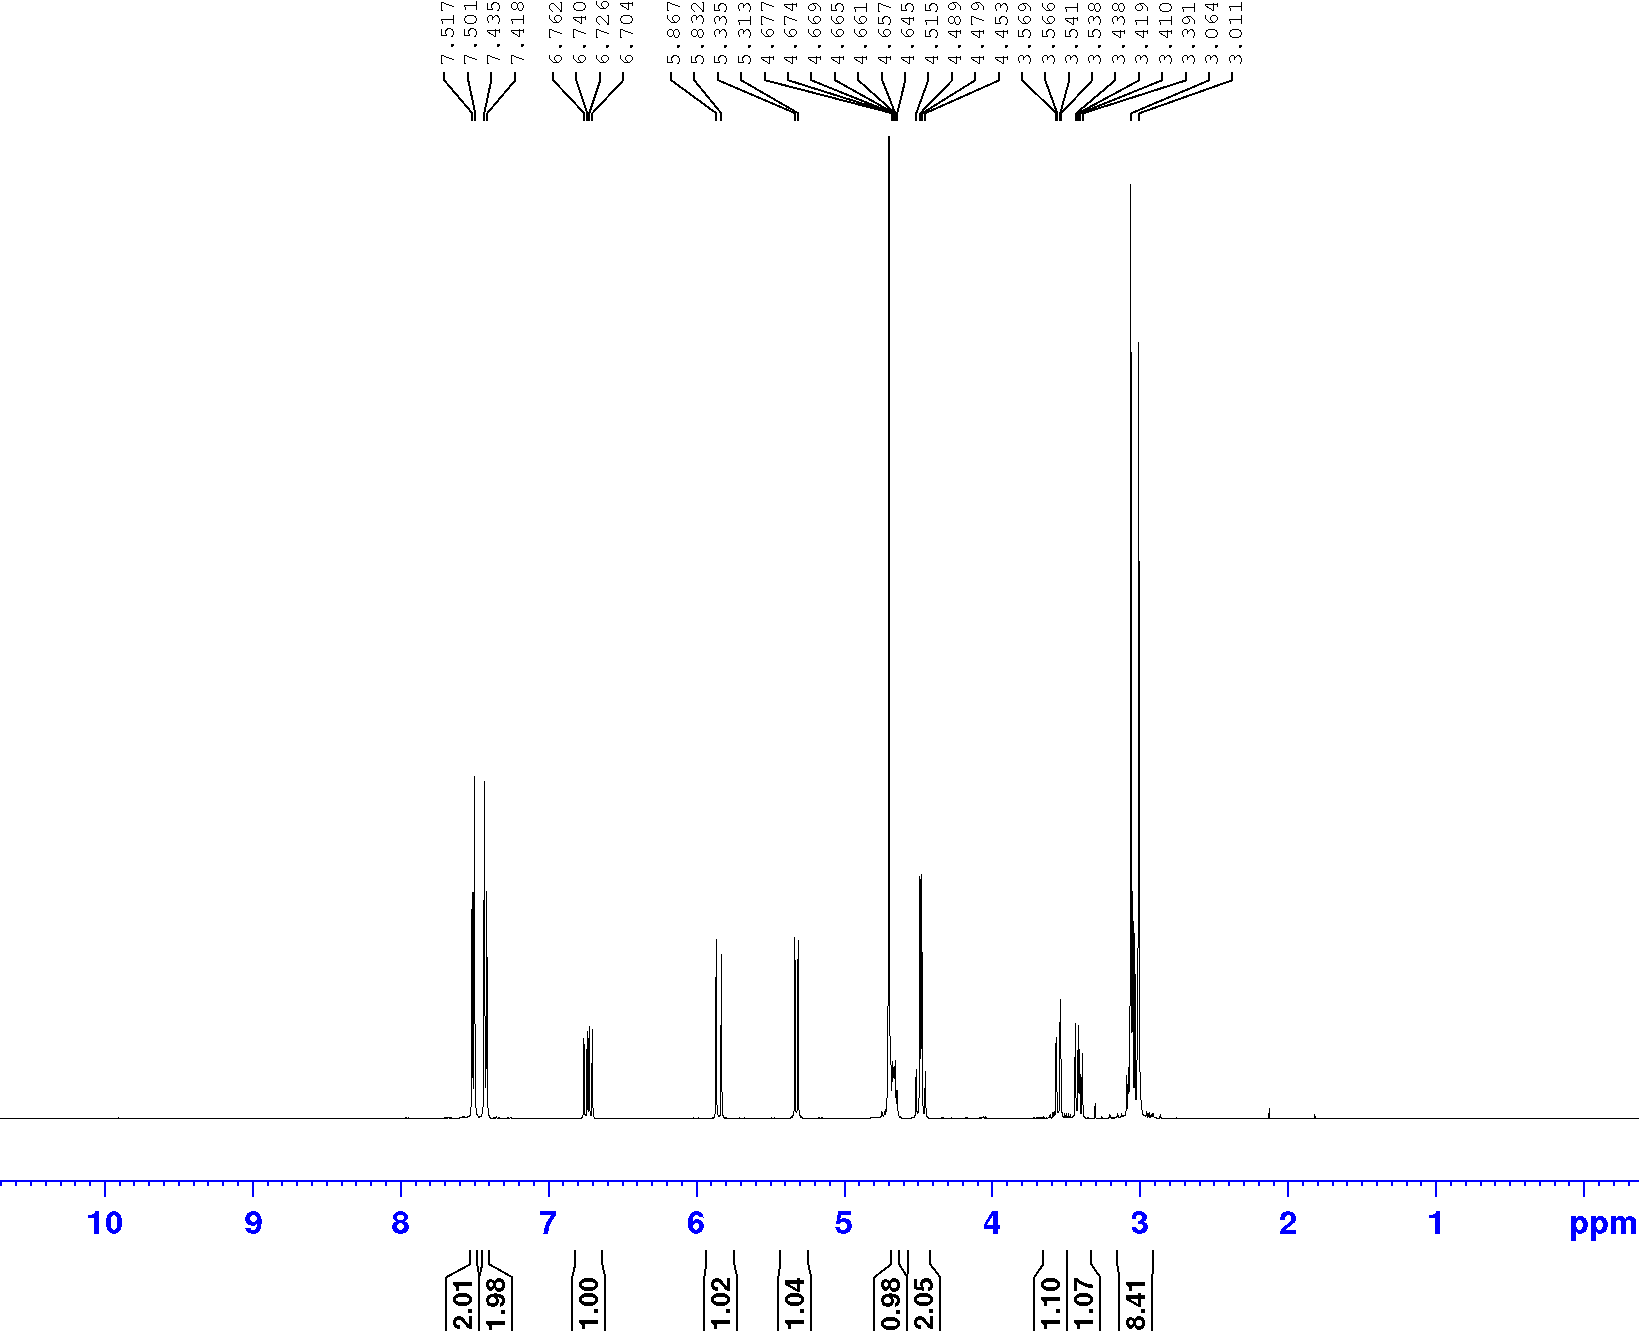
S3: 1H NMR spectrum of monomer 4 recorded in D2O.


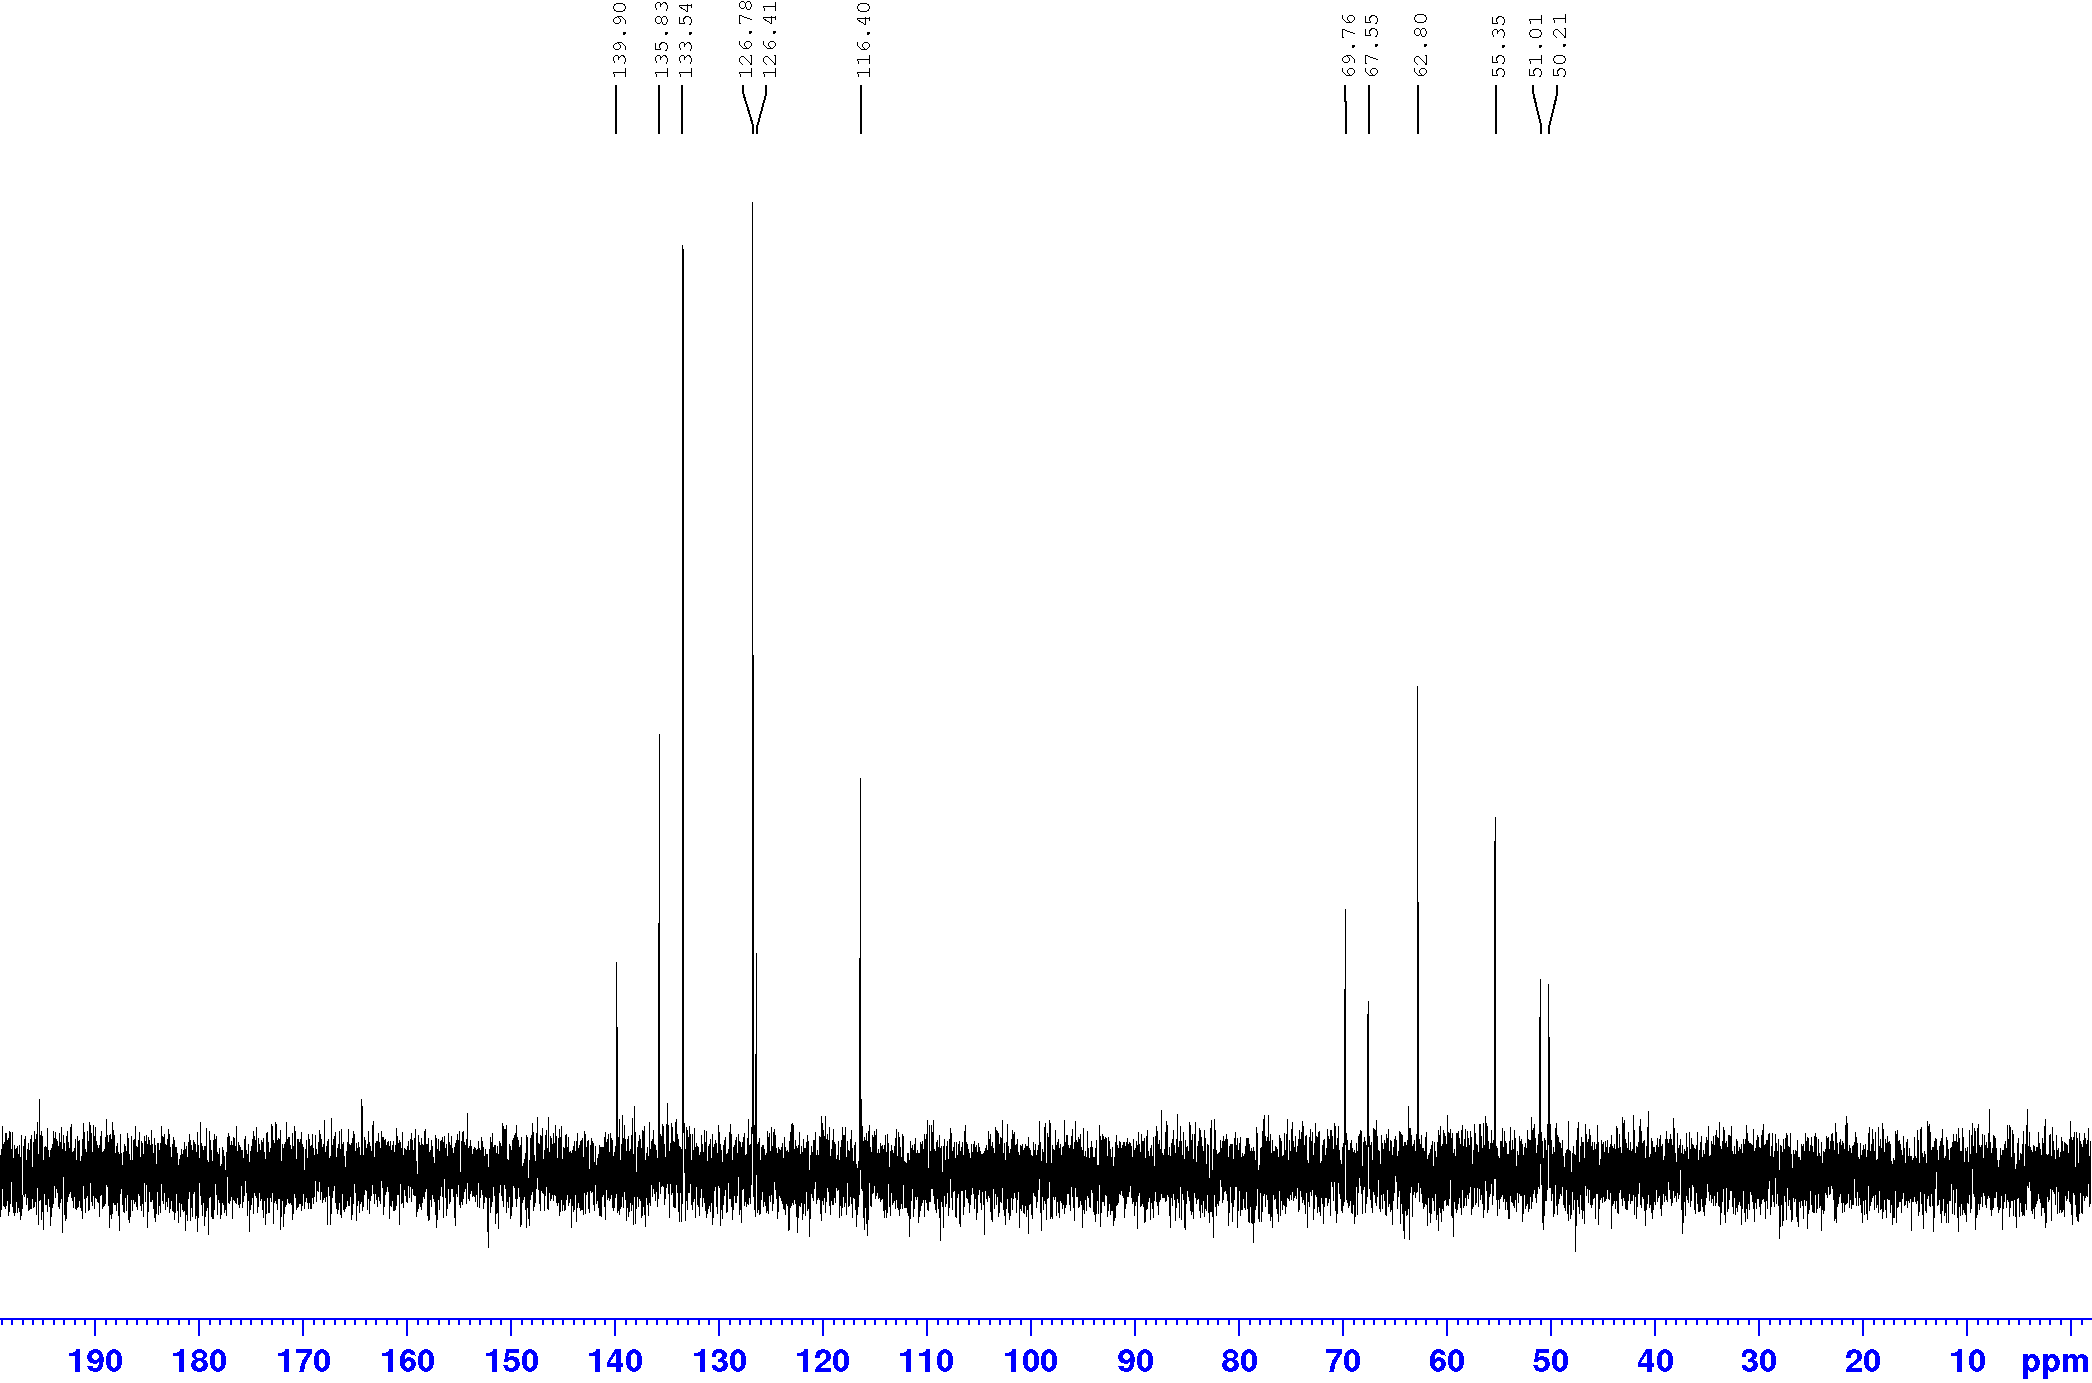


S4: 13C NMR spectrum of monomer **4** recorded in D2O.


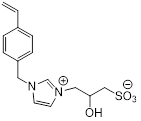

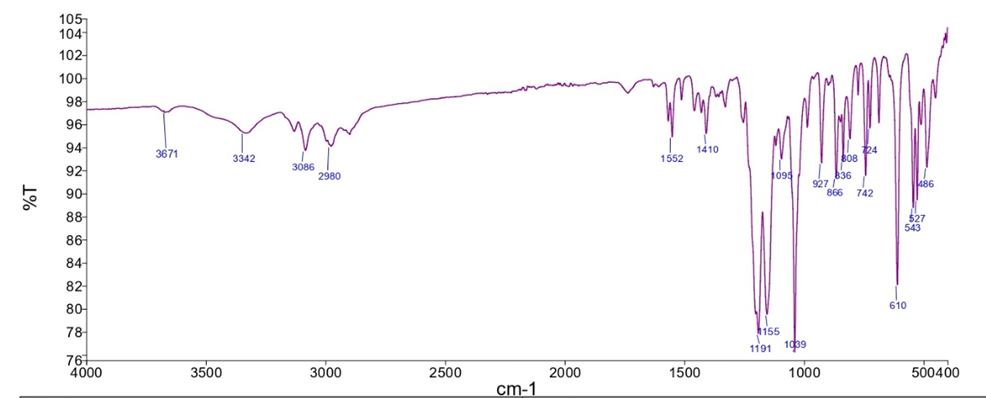


S5: FTIR spectrum of monomer **2**

**
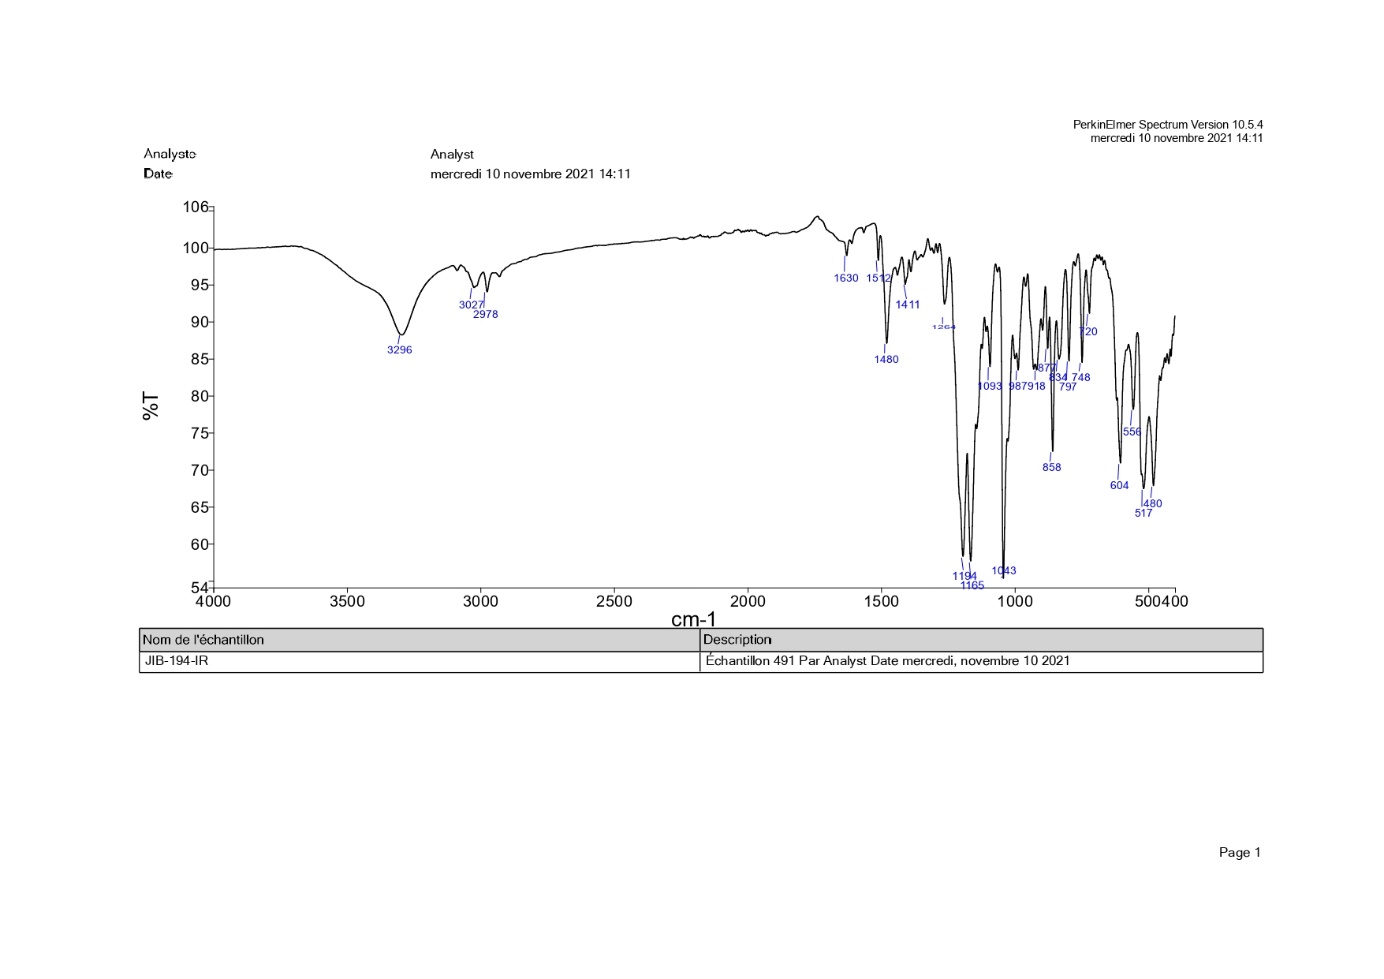
**

S6: FTIR spectrum of monomer **4**

**
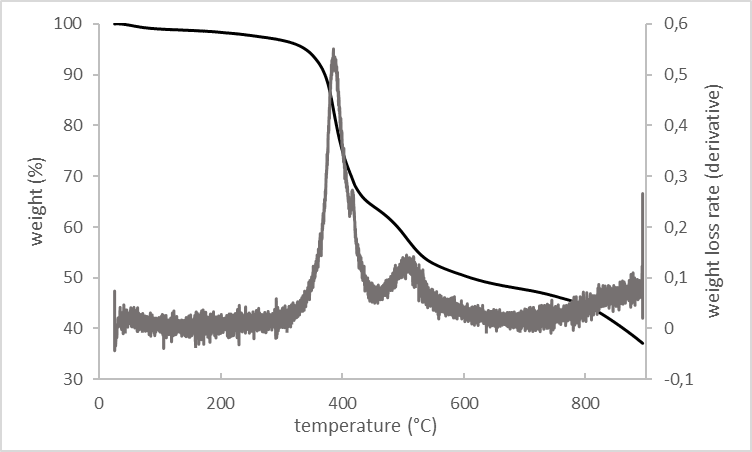
**

S7: Thermogravimetric analysis (TGA) and derivative thermogravimetric curves of monomer **2**
